# Supplementary material for: A RNA Interference Screen Identifies the Protein Phosphatase 2A Subunit PR55γ as a Stress-Sensitive Inhibitor of c-SRC
Source: PLOS journal article supplement (doi:10.1371/journal.pgen.0030218), 2007-11-30
Supplement: S2 (10.1371/journal.pgen.0030218.s002) [file journal.pgen.0030218.s002]

Supplementary Table 2

| Gene Name | GenBank code |
| --- | --- |
| c-SRC | NP_005408 |
| FYN | P13406 |
| LYN | P07948 |
| JNK | NP_002741 |
| MKK4 | NP_003001 |
| CDC42 | CAI19851 |
